# Supplementary material for: New Insights via RNA Profiling of Formalin-Fixed Paraffin-Embedded Lung Tissue of Pulmonary Fibrosis Patients
Source: MDPI journal article supplement (doi:10.3390/ijms242316748), 2023-11-25
Supplement: s1 [file s1]

# New insights via RNA profiling of formalin-fixed paraffin-embedded lung tissue of pulmonary fibrosis patients

Dymph Klay<sup>1</sup>, Karin M Kazemier<sup>2,3</sup>, Joanne J. van der Vis<sup>1,4</sup>, Hidde M Smits<sup>2</sup>, Jan C Grutters<sup>1,3</sup> and Coline HM van Moorsel<sup>1\*</sup>

Table S1: List of primers used to determine RNA expression of genes encoding relevant proteins in lung tissue of patients with pulmonary fibrosis

| Encoded protein | Gene name       | Forward primer (5'-3')     | Reverse primer (5'-3')     |
|-----------------|-----------------|----------------------------|----------------------------|
| SP-B            | <i>SFTPB</i>    | TGAGGACATCGTCCACATCC       | CCAGGAACCTCCTCATCGTGT      |
| SP-C            | <i>SFTPC</i>    | AGCCAGAAACACACGGAGAT       | GCCAGTGGAGCCGATG           |
| SP-A2           | <i>SFTPA2</i>   | GGGACGGGAGAGATGGTG         | CTCCAGGCAGCCCATTATTC       |
| HIF1 $\alpha$   | <i>HIF1A</i>    | GTACCCTAACTAGCCGAGGAAGAA   | GTGAATGTGGCCTGTGCAGT       |
| HIF2 $\alpha$   | <i>EPAS1</i>    | GCGCTAGACTCCGAGAACAT       | TGGCCACTTACTACCTGACCCTT    |
| 53BP1           | <i>TP53BP1</i>  | GTCAGGTCATTGAGCAGTTACCTC   | TCCTCCACAGCAGGAGCAG        |
| H2AFX           | <i>H2AX</i>     | ACTCAACTCGGCAATCCAAG       | GGGTAGCTGCAGAAATCCA        |
| HOPX            | <i>HOPX</i>     | ACTTCAACAAGGTCGACAAGC      | GGGTCTCCTCCTCGGAAA         |
| CAV1            | <i>CAV1</i>     | CACATCTGGGCAGTTGTACC       | CACAGACGGTGTGGACGTAG       |
| CCSP            | <i>SCGB1A1</i>  | GAGCTTTCAGCGTGTTCATCGAA    | CCTGCCTCCCTCATGTCTTGAT     |
| $\alpha$ SMA    | <i>ACTA2</i>    | CAAAGCCGGCCTTACAGAG        | AGCCAGCCAAGCACTG           |
| VIM             | <i>VIM</i>      | TGTCCAAATCGATGTGGATGTTTC   | TTGTACCATTCTTCTGCCTCCTG    |
| TGFBR2          | <i>TGFBR2</i>   | ACGGTGCAGTCAAGTTTCCACAAC   | ACACAGACTTCCTGTGGCTTCTCA   |
| COL1A1          | <i>COL1A1</i>   | TACAGCGTCACTGTCGATGGC      | TCAATCACTGTCTTGCCCCAG      |
| COL1A2          | <i>COL1A2</i>   | CACCCAGAGTGGAGCAGTGG       | TTCTTGGCTGGGATGTTTTCA      |
| COL3A1          | <i>COL3A1</i>   | AATTTGGTGTGGACGTTGGC       | TTGTCGGTCACTTGCACTGG       |
| DDIT3           | <i>DDIT3</i>    | GGAGCATCAGTCCCCCACTT       | TGTGGGATTGAGGGTCACATC      |
| SMAD4           | <i>SMAD4</i>    | AAAACGGCCATCTTCAGCAC       | AGGCCAGTAATGTCCGGGA        |
| HSP90B1         | <i>HSP90B1</i>  | TTGCCAGACCATCCGTA CTG      | GAATTGGATGAAAGATAAAGCCCTTA |
| EDEM            | <i>EDEM1</i>    | CAAGTGTGGGTACGCCACG        | AAAGAAGCTCTCCATCCGGTC      |
| BiP             | <i>HSPA5</i>    | TGTTCAACCAATTATCAGCAA ACTC | TTCTGCTGTATCCTCTTACCAGT    |
| XBP1            | <i>XBP1</i>     | TGGCCGGGTCTGCTGAGTCCG      | ATCCATGGGGAGATGTTCTGG      |
| ATF4            | <i>ATF4</i>     | GGGACAGATTGGATGTTGGAGA     | ACCCAACAGGGCATCCAAGT       |
| LC3B2           | <i>MAP1LC3B</i> | AAACGCATTTGCCATCACA        | GGACCTTCAGCAGTTTACAGTCAG   |
| PSMD11          | <i>PSMD11</i>   | GCCATCTACTGCCCCCTAA        | ATGGATAATACCCGACTGCATGT    |
| P16             | <i>CDKN2A</i>   | TGAGCTTTGGTTCTGCCATT       | AGCTGTCGACTTCATGACAAG      |
| TP53            | <i>TP53</i>     | TAACAGTTCTTCATGGGCGGC      | AGGACAGGCACAAACACGCACC     |
| P21             | <i>CDKN1A</i>   | ACCTTCCAGTCTCTGTAACTACT    | GTCTAGGTGGAGAAACGGGAA      |
| ACTB            | <i>ACTB</i>     | CATTCCAAATATGAGATGCGTTGT   | TGTGGACTTGGGAGAGGACT       |
| RPL13A          | <i>RPL13A</i>   | CCTGGAGGAGAAGAGGAAAGAGA    | TTGAGGACCTCTGTGATTTGTCAA   |
| EEF1A1          | <i>EEF1A1</i>   | CATCAAAGCAGTGGACAAGAAG     | GGGTGGCAGGTATTAGGGATAA     |

*Survival analysis of gene process groups with three or more genes*

Extracellular matrix (ACTA2, VIM, COL1A1, SMAD4 and TGFBR2): p value: 0.18. Survival in patients with high RNA expression of 0-1, 2-3 and 4-5 extracellular matrix genes was 64, 22 and 36 months respectively.

Surfactant homeostasis (SFTPB, SFTPC and SFTPA2): p value: 0.34. Survival in patients with high RNA expression of 0-1 and 2-3 surfactant homeostasis genes was 64 and 29 months respectively.

DNA damage (53BP1, H2AX, TP53): p value: 0.58. Survival in patients with high RNA expression of 0-1 and 2-3 DNA damage genes was 36 and 31 months respectively.

*Survival analysis of gene process groups with two genes*

AEC1 involvement (CAV1 and HOPX): p value: 0.50. Survival in patients with high RNA expression of 0, 1 and 2 AEC1 involvement genes was 43, 38 and 23 months respectively.

Senescence (CDKN1A and CDKN2A): p value: 0.01. Survival in patients with high RNA expression of 0, 1, 2 senescence genes was 93, 22 and 60 months respectively. This analysis is based on 30 out of 49 patients (61%).

Hypoxia (HIF1A and EPAS1): p value: 0.28. Survival in patients with high RNA expression of 0, 1, and 2 hypoxia genes was 38, 42, and 22 months respectively.
